# Supplementary material for: Domestication Origin and Breeding History of the Tea Plant (Camellia sinensis) in China and India Based on Nuclear Microsatellites and cpDNA Sequence Data
Source: PubMed Central journal article supplement (PMC5788969; doi:10.3389/fpls.2017.02270), 2018-01-25
Supplement: Image1.pdf [file Image1.pdf]

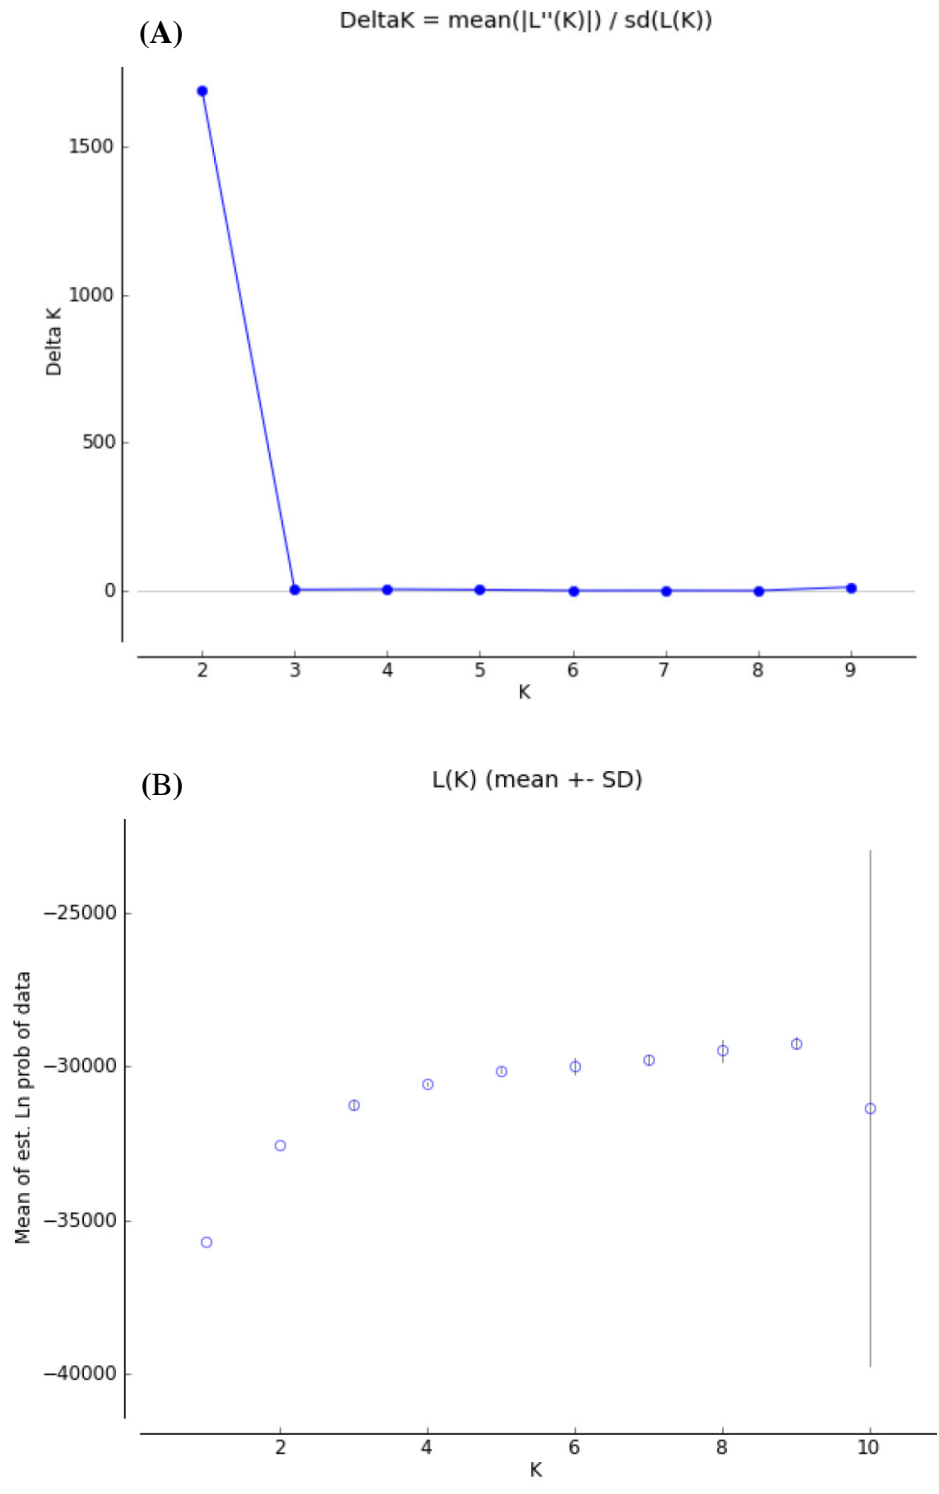

Figure S1 Best  $K$  values for STRUCTURE analysis using two methods of (A)  $\Delta K$  and (B) Log Likelihood ( $K$ ).
